# Supplementary material for: Twinkle twinkle brittle star: the draft genome of Ophioderma brevispinum (Echinodermata: Ophiuroidea) as a resource for regeneration research
Source: PubMed Central journal article supplement (PMC9367165; doi:10.1186/s12864-022-08750-y), 2022-08-11
Supplement: 12864_2022_8750_MOESM3_ESM.pdf [file 12864_2022_8750_MOESM3_ESM.pdf]

---

# Bioinformatics protocols for quality control and genome assembly

All original scripts are available at <http://www.ib.usp.br/grant/anfibios/researchSoftware.html> and at <https://gitlab.com/MachadoDJ> under

the GNU General Public License version 3.0 (GPL-3.0).

---

## Trimmomatic

We used Trimmomatic v0.38 to remove the adapters and low-quality bases at the ends of each read.

### Variables:

- `TRIMMOMATIC_JAR`: Path to Trimmomatic
- `FILE1`: Path to the first paired-end sequence file
- `FILE2`: Path to the first paired-end sequence file

### Main Bash command:

```
1 java -jar ${TRIMMOMATIC_JAR} \  
2   PE -phred33 \  
3   ${FILE1} ${FILE2} \  
4   trimmed_1_paired.fastq.gz trimmed_1_se.fastq.gz \  
5   trimmed_2_paired.fastq.gz trimmed_2_se.fastq.gz \  
6   ILLUMINACLIP:TruSeq3-PE-2.fa:2:30:10 \  
7   LEADING:3 TRAILING:3 SLIDINGWINDOW:4:15 MINLEN:36
```

---

## NxTrim

Long insert size reads were processed in NxTrim v0.3.0-alpha using default parameters to separate reads into four different categories according to the adapter position: mate pairs, unknown (which are mostly mate pairs), paired-end, and single-end sequence reads.

NxTrim v0.3.0-alpha converts raw NMP reads into four "virtual libraries":

- **MP**: a set of known mate pairs having an outward-facing relative orientation and an effective genomic distance (EGD) whose distribution mirrors the size distribution of the circularized DNA
- **Unknown**: A set of read pairs for which the adapter could not be found within either read
- **PE**: a set of paired-end reads, having an inward-facing relative orientation and an EGD whose distribution mirrors the size distribution of the sequenced templates
- **SE**: a set of single reads

### Variables:

- `FILE1`: Path to the first paired-end sequence file

- `FILE2`: Path to the first paired-end sequence file

#### Main Bash command:

```
1 nxtrim --separate -1 ${FILE1} -2 ${FILE2} -0 nxtrimmed
```

## HTQC toolkit

We employed the HTQC toolkit v0.90.8 to produce quality stats per tile (using `ht-stat`) and perform final read trimming and filtering (with `ht-trim` and `ht-filter`, respectively).

#### Variables:

- `PE1`: Path to the first input file of paired-end reads
- `PE2`: Path to the second input file of paired-end reads
- `SE1`: Path to the first input file of single-end reads
- `SE2`: Path to the first input file of single-end reads

#### Main Bash commands:

```
1 function part1 {
2 # STATS:
3 ht-stat -P -t 32 -z -i ${PE1} ${PE2} -o htstatpe > htstatpe_htqc.txt
4 wait
5 python2 selectTilesHTQC.py -d htstatpe > htstatpe_tiles.txt
6 wait
7 ht-stat -S -t 32 -z -i ${SE1} -o htstatse1 > htstatse1_htqc.txt
8 wait
9 python2 selectTilesHTQC.py -d htstatse1 > htstatse1_tiles.txt
10 wait
11 ht-stat -S -t 32 -z -i ${SE2} -o htstatse2 > htstatse2_htqc.txt
12 wait
13 python2 selectTilesHTQC.py -d htstatse2 > htstatse2_tiles.txt
14 wait
15 # TRIM:
16 ht-trim -z -i ${PE1} -o trimmed_pe1.fastq.gz &
17 ht-trim -z -i ${PE2} -o trimmed_pe2.fastq.gz &
18 ht-trim -z -i ${SE1} -o trimmed_se1.fastq.gz &
19 ht-trim -z -i ${SE2} -o trimmed_se2.fastq.gz
20 wait
21 }
22
23 function part2 {
24 # SIEVE:
25 ht-filter -P --filter length -z -i trimmed_pe1.fastq.gz trimmed_pe2.fastq.gz -o filteredpe &
26 ht-filter -S --filter length -z -i trimmed_se1.fastq.gz -o filteredse1 &
27 ht-filter -S --filter length -z -i trimmed_se2.fastq.gz -o filteredse2
28 wait
29 }
30
31 part1
```

```
31 | part1
32 | part2
```

## FastUniq

We used FastUniq v1.1 to remove duplicates introduced by PCR amplification from paired short reads.

**Description of input files** (`files.txt`):

```
1 | filteredpe_1.fastq
2 | filteredpe_2.fastq
```

**Main Bash command:**

```
1 | fastuniq -i files.txt -t q -o fastuniq_pair1.fastq -p fastuniq_pair2.fastq -c 0
```

## ABySS

**Main Bash script:**

```
1 | for KMER in {23..61..2} ; do
2 |     abyss-pe -C k${KMER} k=${KMER} np=8 name=xb_k${KMER} lib='pea' mp='mpb' \
3 |     pea='pe1.fastq pe2.fastq' \
4 |     mpb='mate1.fastq mate2.fastq' \
5 |     se='single.fastq'
6 | done
```

**Notes:**

- `pe`: paired-end reads (short insert size)
- `mate`: mate paired-end reads (long insert size)
- `single`: single-end reads (resulting from quality control)

## Pilon

Pilon v1.2.3 is a software tool that can be used to automatically improve draft assemblies and find variation among strains, including large event detection.

Pilon requires a FASTA file of the genome as input along with one or more BAM files of reads aligned to the input FASTA file. Pilon uses read alignment analysis to identify inconsistencies between the input genome and the evidence in the reads.

The initial step is to create the aligned BAM file from your raw reads. To create the aligned file we used Bowtie2 v2.2.9.

```
1 | bowtie2-build -f genome.fasta aligned
2 | bowtie2 -f -x aligned raw_reads.fasta -S output.sam
```

- The file `genome.fasta` is the whole genome file or the scaffolds that are being aligned to.
- The word `aligned` is the prefix on the index files that will be created.
- `-x`: is the prefix for the index files of the genome/scaffolds
- `-U`: unaligned reads

- `-S`: output in SAM format

The SAM output file needs to be converted to BAM, sorted, and then indexed (the index file is necessary for Pilon to work). To do this, we used samtools v1.6.

```
1 samtools view -S -b aligned_output.sam > aligned_output.bam
2 samtools sort aligned_output.bam -o sorted_output.bam
3 samtools index sorted_output.bam
```

Finally, to execute Pilon:

```
1 java -jar pilon-1.23.jar --genome genome.fasta --bam sorted_output.bam --output pilon.out
```

## MaSuRCA

### Preparing the configuration file

The following is the commented template for creating the MaSuRCA configuration file that we used to create `masurca_config.txt`:

```
1 DATA
2
3 #####
4 ## Paired end ##
5 #####
6
7 # pair ends (forward and reverse) must be listed in the same PE variable.
8 PE= pa 300 35 /path/to/forward.fastq /path/to/reverse.fastq
9
10 ### If you have multiple paired-end sequences then add them as shown below ###
11 PE= pb 300 35 /path/to/forward.fastq /path/to/reverse.fastq
12 PE= pc 300 35 /path/to/forward.fastq /path/to/reverse.fastq
13 PE= pd 300 35 /path/to/forward.fastq /path/to/reverse.fastq
14
15 #####
16 ## Jumping Pairs (mate paired) ##
17 #####
18
19 # mate paired (forward and reverse) must be listed in the same JUMP variable.
20 JUMP= ma 3000 500 /path/to/forward.fastq /path/to/reverse.fastq
21
22 ### If you have multiple mate-pair sequences then add them as shown below ###
23 JUMP= mb 5000 750 /path/to/forward.fastq /path/to/reverse.fastq
24 JUMP= mc 8000 1000 /path/to/forward.fastq /path/to/reverse.fastq
25 JUMP= md 10000 1500 /path/to/forward.fastq /path/to/reverse.fastq
26
27 #####
28 ## PacBio ##
29 #####
30
31 PACBIO= /path/to/pacbio/data.fasta
32
33 END
34
35 PARAMETERS
36
```

```
37 # GRAPH_KMER_SIZE is k-mer size for deBruijn graph values between 25 and 101 are supported, auto
38 GRAPH_KMER_SIZE=auto
39
40 # Set USE_LINKING_MATES to 1 for Illumina-only assemblies and to 0 if you have 2x or more long (C
41 USE_LINKING_MATES=0
42
43 # ILLUMINA ONLY. Set this to 1 to use SOAPdenovo contigging/scaffolding module. Assembly will be
44 SOAP_ASSEMBLY=0
45
46 # Hybrid Illumina paired end + Nanopore/PacBio assembly ONLY. Set this to 1 to use Flye assembl
47
48 # FLYE_ASSEMBLY=0
49
50 # Set this to 1 if your Illumina jumping library reads are shorter than 100bp
51 EXTEND_JUMP_READS=0
52
53 # Specifies whether to run the assembly on the grid
54 USE_GRID=0
55
56 # Specifies grid engine to use SGE or SLURM
57
58 # GRID_ENGINE=SGE
59
60 # Specifies queue (for SGE) or partition (for SLURM) to use when running on the grid MANDATORY
61
62 # GRID_QUEUE=all.q
63
64 # Batch size in the amount of long read sequence for each batch on the grid
65
66 # GRID_BATCH_SIZE=500000000
67
68 #set to 0 (default) to do two passes of mega-reads for slower, but higher quality assembly, other
69
70 # MEGA_READS_ONE_PASS=0
71
72 # Use at most this much coverage by the longest Pacbio or Nanopore reads, discard the rest of the
73 LHE_COVERAGE=25
74
75 # LIMIT_JUMP_COVERAGE is useful if you have too many jumping library mates. Typically set it to 0
76 LIMIT_JUMP_COVERAGE = 300
77
78 # These are the additional parameters to Celera Assembler. Do not worry about performance, number
79 CA_PARAMETERS = ovMerSize=87 cgwErrorRate=0.1 ovMemory=7.5GB merOverlapperThreads=8 cgwErrorRate
80
81 # CABOG ASSEMBLY ONLY: whether to attempt to close gaps in scaffolds with Illumina or long read
82 CLOSE_GAPS=1
83
84 # Minimum count k-mers used in error correction 1 means all k-mers are used. one can increase to
85 KMER_COUNT_THRESHOLD = 1
86
87 # Auto-detected number of cpus to use
88 NUM_THREADS= 64
89
90 # This is mandatory jellyfish hash -- a safe value is estimated_genome_size*20
91 JF_SIZE=180000000000
92
```

```
93 # This specifies if we do (1) or do not (0) want to trim long runs of homopolymers (e.g. GGGGGG)
94 DO_HOMOPOLYMER_TRIM=0
95
96 END
```

## Configuration file

This is a comment-free version of `masurca_config.txt`:

```
1 DATA
2 PE= aa 300 35 25JUNE2016HiSeq_Run_Sample_0b_PCRFree_UNCC_Janies_ACTTGA_L002_R1_001.fastq.gz 25JUN
3 END
4 PARAMETERS
5 GRAPH_KMER_SIZE=auto
6 USE_LINKING_MATES=1
7 LIMIT_JUMP_COVERAGE = 300
8 CA_PARAMETERS = ovMerSize=87 cgwErrorRate=0.1 ovMemory=7.5GB merOverlapperThreads=8
9 KMER_COUNT_THRESHOLD = 2
10 NUM_THREADS= 64
11 JF_SIZE=3400000000
12 DO_HOMOPOLYMER_TRIM=0
13 END
```

## Executing MaSuRCA on UNC Charlotte's high-memory Linux cluster

The following **PBS execution script** was used to run MaSuRCA at UNC Charlotte's 4TB memory machine that is part of the HammerHead Linux cluster:

```
1 #!/bin/bash
2
3 #PBS -l nodes=1:ppn=64
4 #PBS -l mem=3904gb
5 #PBS -N masurca.ob
6 #PBS -j oe
7 #PBS -q hammerhead
8 #PBS -l feature=mem_4tb
9 #PBS -l walltime=700:00:00
10
11 IFS=$'\n'
12 set -eu
13
14 umask 007
15 module load masurca/3.2.7
16 module list
17 masurca masurca_config.txt
18 bash assemble.sh
```

## Quickmerge

Quickmerge uses a simple concept to improve the contiguity of genome assemblies based on long molecule sequences, often with dramatic improvement. The program uses information from assemblies made with Illumina short reads and Pacific Biosciences or Oxford Nanopore long reads to improve assembly contiguity with long reads alone. This is counterintuitive because Illumina short reads are not typically considered to cover genomic regions, which PacBio and ONP long reads cannot. Read more at

<https://github.com/mahulchak/quickmerge>. Also, read more about different strategies on how to use quickmerge at <https://github.com/mahulchak/quickmerge/wiki>.

#### Template command line:

```
$ nohup merge_wrapper.py -pre [OUTPUT PREFIX] [MULTIFASTA BEST ASSEMBLY] [MULTIFASTA FRAGMENTED ASSEMBLY] >[STDOUT] 2> [STDERR] &
```

The merge\_wrapper.py script comes with quickmerge. It may take several hours to complete.

---

## Assembly stats

Accessing assembly statistics in a multifasta file is easy with the `assemblathon_stats.pl` Perl script, which only requires `FALite.pm` (add its to the PERL5LIB environmental variable, or place it in the same directory as other Perl modules). The script is available at <https://github.com/ucdavis-bioinformatics/assemblathon2-analysis>.

---

## BUSCO

The completeness of protein-coding gene representation in the assembly was assessed with BUSCO v4.0.6 run in the "genome mode" against the evolutionary conserved metazoan gene set (metazoaodb10, creation date: 2021-02-17, number of species: 65, number of BUSCOs: 954) and the conserved eukaryota gene set (eukaryotaodb10, creation date: 2020-09-10, number of species: 70, number of BUSCOs: 255).

Since *O. brevispinum* is not listed among the available species available for Augustus training, we tested other three species: *Homo sapiens*, *Drosophila melanogaster*, and *Strongylocentrotus purpuratus*.

This is an example of an Bash execution script:

```
1 #!/usr/bin/bash
2
3 export AUGUSTUS_CONFIG_PATH="/path/to/AUGUSTUS_33/config/"
4 export BUSCO_CONFIG_FILE="/path/to/busco/config.ini"
5
6 module load busco/4.0.6
7 cd /path/to/working/directory
8
9 busco -i /path/to/assembly.fasta -c 60 -o OutputPrefix -e 1e-03 -m genome
10 --config config.ini -l /path/to/database
11
12 exit
```

We also ran BUSCO v4.0.6 on the predicted transcripts extracted from the BRAKER2 annotation using BUSCO's "protein mode." A table summarizing all BUSCO's results is below.

| Database        | Species       | Mode    | Complete     | Complete and single-copy | Complete and duplicated | Fragmented   | Missing      | Total |
|-----------------|---------------|---------|--------------|--------------------------|-------------------------|--------------|--------------|-------|
| eukaryota_odb10 | Fly           | Genome  | 57 (22.35%)  | 56 (21.96%)              | 1 (0.39%)               | 39 (15.29%)  | 159 (62.35%) | 255   |
| eukaryota_odb10 | Fly           | Protein | 15 (5.88%)   | 15 (5.88%)               | 0 (0.00%)               | 92 (36.08%)  | 148 (58.04%) | 255   |
| eukaryota_odb10 | Human         | Genome  | 55 (21.57%)  | 55 (21.57%)              | 0 (0.00%)               | 45 (17.65%)  | 155 (60.78%) | 255   |
| eukaryota_odb10 | Human         | Protein | 15 (5.88%)   | 15 (5.88%)               | 0 (0.00%)               | 92 (36.08%)  | 148 (58.04%) | 255   |
| eukaryota_odb10 | S. purpuratus | Genome  | 51 (20.00%)  | 50 (19.61%)              | 1 (0.39%)               | 42 (16.47%)  | 162 (63.53%) | 255   |
| eukaryota_odb10 | S. purpuratus | Protein | 15 (5.88%)   | 15 (5.88%)               | 0 (0.00%)               | 92 (36.08%)  | 148 (58.04%) | 255   |
| metazoa_odb10   | Fly           | Genome  | 287 (30.08%) | 280 (29.35%)             | 7 (0.73%)               | 173 (18.13%) | 494 (51.78%) | 954   |
| metazoa_odb10   | Fly           | Protein | 101 (10.59%) | 94 (9.85%)               | 7 (0.73%)               | 264 (27.67%) | 589 (61.74%) | 954   |
| metazoa_odb10   | Human         | Genome  | 288 (30.19%) | 282 (29.56%)             | 6 (0.63%)               | 153 (16.04%) | 513 (53.77%) | 954   |
| metazoa_odb10   | Human         | Protein | 101 (10.59%) | 94 (9.85%)               | 7 (0.73%)               | 264 (27.67%) | 589 (61.74%) | 954   |
| metazoa_odb10   | S. purpuratus | Genome  | 244 (25.58%) | 241 (25.26%)             | 3 (0.31%)               | 188 (19.71%) | 522 (54.72%) | 954   |
| metazoa_odb10   | S. purpuratus | Protein | 101 (10.59%) | 94 (9.85%)               | 7 (0.73%)               | 264 (27.67%) | 589 (61.74%) | 954   |
