# Supplementary material for: Twinkle twinkle brittle star: the draft genome of Ophioderma brevispinum (Echinodermata: Ophiuroidea) as a resource for regeneration research
Source: PubMed Central journal article supplement (PMC9367165; doi:10.1186/s12864-022-08750-y), 2022-08-11
Supplement: 12864_2022_8750_MOESM6_ESM.pdf [file 12864_2022_8750_MOESM6_ESM.pdf]

## Expected variation in the haploid genome size of echinoderms

The observed haploid genome size in echinoderms varies over 8-fold from 0.53 Gbp in *Dermasterias imbricata* (a sea star) to 4.3 Gbp in *Thyonella gemmata* (a sea cucumber). The largest haploid genomes in the subphylum Asterozoa belong to the order Ophiurida, and it is most extensive in the brittle star *Ophioderma panamensis* (3.3 Gbp).

## Estimated C-values for echinoderm species

The following table was compiled from data available at the Animal Genome Size Database (Gregory, 2020). The "C-value" means the "constant" (or "characteristic") value of haploid DNA content per nucleus, typically measured in picograms (1 pg is approx. 0.978 Gbp). The chromosome number for all the species listed below is not available.

| Phylum        | Subphylum | Class        | Order         | Family          | Species                             | Common Name  | C-value (pg) | Method | Cell Type | Standard species |
|---------------|-----------|--------------|---------------|-----------------|-------------------------------------|--------------|--------------|--------|-----------|------------------|
| Echinodermata | Asterozoa | Stelleroidea | Forcipulatida | Asteriidae      | <i>Asterias forbesi</i>             | Sea star     | 0.60         | BFA    | S         | SP               |
| Echinodermata | Asterozoa | Stelleroidea | Forcipulatida | Asteriidae      | <i>Astrometis sertulifera</i>       | Sea star     | 0.70         | BFA    | S         | SP               |
| Echinodermata | Asterozoa | Stelleroidea | Forcipulatida | Asteriidae      | <i>Pisaster giganteus capitatus</i> | Sea star     | 0.58         | BFA    | S         | SP               |
| Echinodermata | Asterozoa | Stelleroidea | Forcipulatida | Asteriidae      | <i>Pisaster giganteus giganteus</i> | Sea star     | 0.68         | BFA    | S         | SP               |
| Echinodermata | Asterozoa | Stelleroidea | Forcipulatida | Asteriidae      | <i>Pycnopodia helianthoides</i>     | Sea star     | 0.79         | BFA    | S         | SP               |
| Echinodermata | Asterozoa | Stelleroidea | Ophiurida     | Ophiocomidae    | <i>Ophiocoma echinata</i>           | Serpent star | 2.40         | BFA    | S         | SP               |
| Echinodermata | Asterozoa | Stelleroidea | Ophiurida     | Ophiocomidae    | <i>Ophiopteris papillosa</i>        | Serpent star | 2.30         | BFA    | S         | SP               |
| Echinodermata | Asterozoa | Stelleroidea | Ophiurida     | Ophiodermatidae | <i>Ophioderma panamensis</i>        | Serpent star | 3.30         | BFA    | S         | SP               |
| Echinodermata | Asterozoa | Stelleroidea | Ophiurida     | Ophiothrichidae | <i>Ophiothrix spinosum</i>          | Serpent star | 2.20         | BFA    | S         | SP               |
| Echinodermata | Asterozoa | Stelleroidea | Ophiurida     | Ophiuridae      | <i>Ophioplocus esmarki</i>          | Serpent star | 3.00         | BFA    | S         | SP               |
| Echinodermata | Asterozoa | Stelleroidea | Spinulosida   | Asterinidae     | <i>Patiria miniata</i>              | Sea star     | 0.76         | BFA    | S         | SP               |
| Echinodermata | Asterozoa | Stelleroidea | Spinulosida   | Echinasteridae  | <i>Echinaster echinophorus</i>      | Sea star     | 0.96         | BFA    | S         | SP               |
| Echinodermata | Asterozoa | Stelleroidea | Spinulosida   | Echinasteridae  | <i>Echinaster sepositus</i>         | Red starfish | 0.76         | FCM    | HE        | MGP              |
| Echinodermata | Asterozoa | Stelleroidea | Spinulosida   | Echinasteridae  | <i>Henricia leviuscula</i>          | Sea star     | 0.85         | BFA    | S         | SP               |
| Echinodermata | Asterozoa | Stelleroidea | Spinulosida   | Echinasteridae  | <i>Henricia sanguinolenta</i>       | Sea star     | 0.89         | BFA    | S         | SP               |
| Echinodermata | Asterozoa | Stelleroidea | Spinulosida   | Poraniidae      | <i>Dermasterias imbricata</i>       | Sea star     | 0.54         | BFA    | S         | SP               |

|               |           |               |                 |                      |                                          |                      |      |     |    |     |
|---------------|-----------|---------------|-----------------|----------------------|------------------------------------------|----------------------|------|-----|----|-----|
| Echinodermata | Echinozoa | Echinoidea    | Arbacioida      | Arbaciidae           | <i>Arbacia aequituberculata</i>          | Sea urchin           | 0.67 | NS  | S  | NS  |
| Echinodermata | Echinozoa | Echinoidea    | Arbacioida      | Arbaciidae           | <i>Arbacia punctulata</i>                | Sea urchin           | 0.76 | BFA | S  | SP  |
| Echinodermata | Echinozoa | Echinoidea    | Arbacioida      | Arbaciidae           | <i>Arbacia</i> sp.                       | Sea urchin           | 0.79 | BCA | S  | NS  |
| Echinodermata | Echinozoa | Echinoidea    | Clypeasteroida  | Dendrasteridae       | <i>Dendraster excentricus</i>            | Sand dollar          | 1.10 | BFA | S  | SP  |
| Echinodermata | Echinozoa | Echinoidea    | Clypeasteroida  | Echinarachniidae     | <i>Echinarachnius parma</i>              | Sand dollar          | 1.10 | BFA | S  | SP  |
| Echinodermata | Echinozoa | Echinoidea    | Clypeasteroida  | Mellitidae           | <i>Mellita quinquesperforata</i>         | Sand dollar          | 0.98 | BFA | S  | SP  |
| Echinodermata | Echinozoa | Echinoidea    | Diadematoidea   | Diadematidae         | <i>Centrostephanus coronatus</i>         | Sea urchin           | 1.20 | BFA | S  | SP  |
| Echinodermata | Echinozoa | Echinoidea    | Echinoida       | Echinidae            | <i>Paracentrotus lividus</i>             | Sea urchin           | 0.54 | FCM | HE | MGP |
| Echinodermata | Echinozoa | Echinoidea    | Echinoida       | Echinidae            | <i>Paracentrotus lividus</i>             | Sea urchin           | 0.90 | NS  | S  | NS  |
| Echinodermata | Echinozoa | Echinoidea    | Echinoida       | Echinidae            | <i>Sterechinus neumayeri</i>             | Sea urchin           | 0.69 | BFA | NS | NS  |
| Echinodermata | Echinozoa | Echinoidea    | Echinoida       | Echinometridae       | <i>Echinometra lacunter</i>              | Sea urchin           | 0.86 | BFA | S  | SP  |
| Echinodermata | Echinozoa | Echinoidea    | Echinoida       | Echinometridae       | <i>Echinometra mathaei</i>               | Sea urchin           | 0.89 | BCA | S  | HS  |
| Echinodermata | Echinozoa | Echinoidea    | Echinoida       | Echinometridae       | <i>Echinometra</i> sp.                   | Sea urchin           | 0.98 | FD  | S  | GD  |
| Echinodermata | Echinozoa | Echinoidea    | Echinoida       | Strongylocentrotidae | <i>Strongylocentrotus droebachiensis</i> | Sea urchin           | 0.90 | BFA | S  | SP  |
| Echinodermata | Echinozoa | Echinoidea    | Echinoida       | Strongylocentrotidae | <i>Strongylocentrotus franciscanus</i>   | Sea urchin           | 0.83 | BFA | S  | SP  |
| Echinodermata | Echinozoa | Echinoidea    | Echinoida       | Strongylocentrotidae | <i>Strongylocentrotus purpuratus</i>     | Sea urchin           | 0.89 | BFA | S  | NS  |
| Echinodermata | Echinozoa | Echinoidea    | Spatangoida     | Loveniidae           | <i>Lovenia cordiformis</i>               | Heart urchin         | 1.30 | BFA | S  | SP  |
| Echinodermata | Echinozoa | Echinoidea    | Temnopleuroidea | Toxopneustidae       | <i>Lytechinus pictus</i>                 | Sea urchin           | 0.97 | BFA | S  | SP  |
| Echinodermata | Echinozoa | Echinoidea    | Temnopleuroidea | Toxopneustidae       | <i>Lytechinus</i> sp.                    | Sea urchin           | 0.90 | NS  | S  | NS  |
| Echinodermata | Echinozoa | Echinoidea    | Temnopleuroidea | Toxopneustidae       | <i>Lytechinus variegatus</i>             | Sea urchin           | 0.92 | BFA | S  | SP  |
| Echinodermata | Echinozoa | Echinoidea    | Temnopleuroidea | Toxopneustidae       | <i>Tripneustes esculentus</i>            | Sea urchin           | 1.10 | BFA | S  | SP  |
| Echinodermata | Echinozoa | Holothuroidea | Apodida         | Synaptidae           | <i>Leptosynapta tenuis</i>               | Sea cucumber         | 1.80 | BFA | S  | SP  |
| Echinodermata | Echinozoa | Holothuroidea | Aspidochirotida | Holothuriidae        | <i>Holothuria floridana</i>              | Florida sea cucumber | 2.30 | BFA | S  | SP  |

|               |           |               |                 |                  |                               |              |      |     |   |    |
|---------------|-----------|---------------|-----------------|------------------|-------------------------------|--------------|------|-----|---|----|
| Echinodermata | Echinozoa | Holothuroidea | Aspidochirotida | Stichopodidae    | <i>Stichopus californicus</i> | Sea cucumber | 0.79 | BFA | S | SP |
| Echinodermata | Echinozoa | Holothuroidea | Aspidochirotida | Stichopodidae    | <i>Stichopus diabolae</i>     | Sea cucumber | 0.99 | FD  | S | GD |
| Echinodermata | Echinozoa | Holothuroidea | Dendrochirotida | Cucumariidae     | <i>Cucumaria rubi</i>         | Sea cucumber | 3.10 | BFA | S | SP |
| Echinodermata | Echinozoa | Holothuroidea | Dendrochirotida | Cucumariidae     | <i>Thyone briareus</i>        | Sea cucumber | 1.70 | BFA | S | SP |
| Echinodermata | Echinozoa | Holothuroidea | Dendrochirotida | Cucumariidae     | <i>Thyone mexicana</i>        | Sea cucumber | 1.90 | BFA | S | SP |
| Echinodermata | Echinozoa | Holothuroidea | Dendrochirotida | Cucumariidae     | <i>Thyonella gemmata</i>      | Sea cucumber | 4.40 | BFA | S | SP |
| Echinodermata | Echinozoa | Holothuroidea | Dendrochirotida | Psolidae         | <i>Thyonopsolus nutriens</i>  | Sea cucumber | 2.30 | BFA | S | SP |
| Echinodermata | Echinozoa | Holothuroidea | Dendrochirotida | Sclerodactylidae | <i>Eupentacta</i> sp.         | Sea cucumber | 2.00 | BFA | S | SP |
| Echinodermata | Echinozoa | Holothuroidea | Molpadida       | Molpadiidae      | <i>Molpadia arenicola</i>     | Sea cucumber | 0.85 | BFA | S | SP |

## Abbreviations

- BCA: Biochemical Assay
- BFA: Bulk Fluorometric Assay
- FCM: Flow Cytometry
- FD: Feulgen Densitometry
- GD: *Gallus domesticus* (chicken), C-value of 1.25 pg
- HE: Haemocytes
- MGP: *Mytilus galloprovincialis* (Mediterranean mussel), C-value of 1.92 pg
- NS: Not Specified
- S: Sperm
- SP: *Strongylocentrus purpuratus* (Pacific purple sea urchin), C-value of 0.89 pg

## References

- Fafandel, M., N. Bihari, Smodlaka, and S. Ravlic (2008). Hemocytes/coelomocytes DNA content in five marine invertebrates: cell cycles and genome sizes. *Biologia* 63: 730-736.
- Gregory, T.R. (2020). Animal Genome Size Database. <http://www.genomesize.com>. Accessed on Nov. 6, 2020.
- Hinegardner, R. (1974b). Cellular DNA content of the Echinodermata. *Comparative Biochemistry and Physiology* 49B: 219-226.
- Hinegardner, R.T. (1961). The DNA content of isolated sea urchin egg nuclei. *Experimental Cell Research* 25: 341-347.
- Marsh, A., P.K.K. Leong, and D.T. Manahan (1999). Energy metabolism during embryonic development and larval growth of an Antarctic sea urchin. *Journal of Experimental Biology* 202: 2041-2050.
- Marshak, A. and C. Marshak (1953). Desoxyribonucleic acid in Arbacia eggs. *Experimental Cell Research* 5: 288-300.
- Mirsky, A.E. and H. Ris (1951). The desoxyribonucleic acid content of animal cells and its evolutionary significance. *Journal of General Physiology* 34: 451-462.
- White, M.J.D. (1961). *The Chromosomes*. John Wiley & Sons, New York.
