# Supplementary material for: Twinkle twinkle brittle star: the draft genome of Ophioderma brevispinum (Echinodermata: Ophiuroidea) as a resource for regeneration research
Source: PubMed Central journal article supplement (PMC9367165; doi:10.1186/s12864-022-08750-y), 2022-08-11
Supplement: 12864_2022_8750_MOESM8_ESM.pdf [file 12864_2022_8750_MOESM8_ESM.pdf]

# Protocol for DNA repeat classification

## Dependencies

---

The following programs and their corresponding dependencies are needed:

- RMBlast v2.6.0, available at <http://www.repeatmasker.org/RMBlast.html>
- RepeatScout v1.0.5, available at <https://github.com/mmcco/RepeatScout>
- RepeatMasker v4.0.8, available at <http://www.repeatmasker.org/>
- RepeatModeler v1.0.11, available at <http://www.repeatmasker.org/RepeatModeler/>

We are assuming these programs will be available as different modules named according to the program's name and organized by version.

This protocol was designed for a Linux computer.

## Creating a custom repeat library with RepeatModeler

---

The following Bash script was used to execute RepeatModeler.

```
set -o errexit
# Function to check the number of arguments and define local variables:
if [ "$#" != 4 ] ; then
    echo "Error 0: Illegal number of parameters. Expected 4, found $#."
    exit
else
    export WD=$1
    export FASTA=$2
    export NAME=$3
    export PROCS=$4
fi
# Function to check working directory and input files:
function preparations {
    if [ -d ${WD} ] ; then
        cd ${WD}
        echo "WD=${WD}"
    else
        echo "Error 1: Cannot change into working directory."
        exit
    fi
}
```

```

fi
if [ -f ${FASTA} ] ; then
    echo "FASTA=${WD}/${FASTA}"
else
    echo "Error 2: Cannot find input file."
    exit
fi
}
# Function to load necessary modules:
function moduleload {
    module load rmbblast/2.6.0
    module load repeatscout/1.0.5
    module load repeatmasker/4.0.8
    module load repeatmodeler/1.0.11
    module list
}
function buildddb {
    BuildDatabase -name ${NAME} -engine ncbi ${FASTA}
    wait
}
# Function to execute RepeatModeler:
function runrm {
    RepeatModeler -engine ncbi -pa ${PROCS} -database ${NAME}
    wait
}
# Execute functions:
preparations
moduleload
buildddb
runrm
exit

```

The script above can be executed as

```
bash ${scriptName} ${workingDir} ${pathToFasta} ${nameOfDatabase} ${noOfProcessors}
```

where `scriptName` is the script's name, `workingDir` is the path to the working directory, `pathToFasta` is the path to the genome assembly in FASTA format, `nameOfDatabase` is the databases' name, and `noOfProcessors` are the number of processors to use.

Time to completion will vary depending on computational resources, but in the case of a diploid genome of the size of about 3 Gbp, it will take approximately 48 hours to complete a single run.

RepeatModeler will output several files into a directory with the prefix `R`. Within that directory, the main results will be named `consensi.fa.classifie`. This file contains all identified repeats and will be needed in the next stage.

## Converting the RepeatMasker's repeat library to FASTA

## format

---

The FASTA file extracted from **embl** files with `buildRMLibFromEMBL.pl` (available at <https://github.com/rmhubble/RepeatMasker/blob/master/util/buildRMLibFromEMBL.pl>). Make sure the generated file is complete and includes all standard headers and sequences.

## Combining the repeat libraries and running RepeatMasker

---

You can concatenate the FASTA files from different sources to build a concatenated database.

The following is an example Bash script to execute RepeatMasker given a final version of the repeat library named `library.fasta` and a file containing the genome assembly named `genome.fasta`:

```
module load rmbblast/2.6.0 repeatmasker/4.0.8
module list
function main {
    # This will run RepeatMasker on slow sensitive mode:
    RepeatMasker \
        -lib library.fasta \
        -s -gff -pa 10 \
        genome.fasta
}
main
exit
```
